# Supplementary material for: Exposure to air pollutants and subclinical carotid atherosclerosis measured by magnetic resonance imaging: A cross-sectional analysis
Source: PubMed Central journal article supplement (PMC11527219; doi:10.1371/journal.pone.0309912), 2024-10-31

**Figure S1: Flow chart for Air pollution and MRI markers in CAHMM**

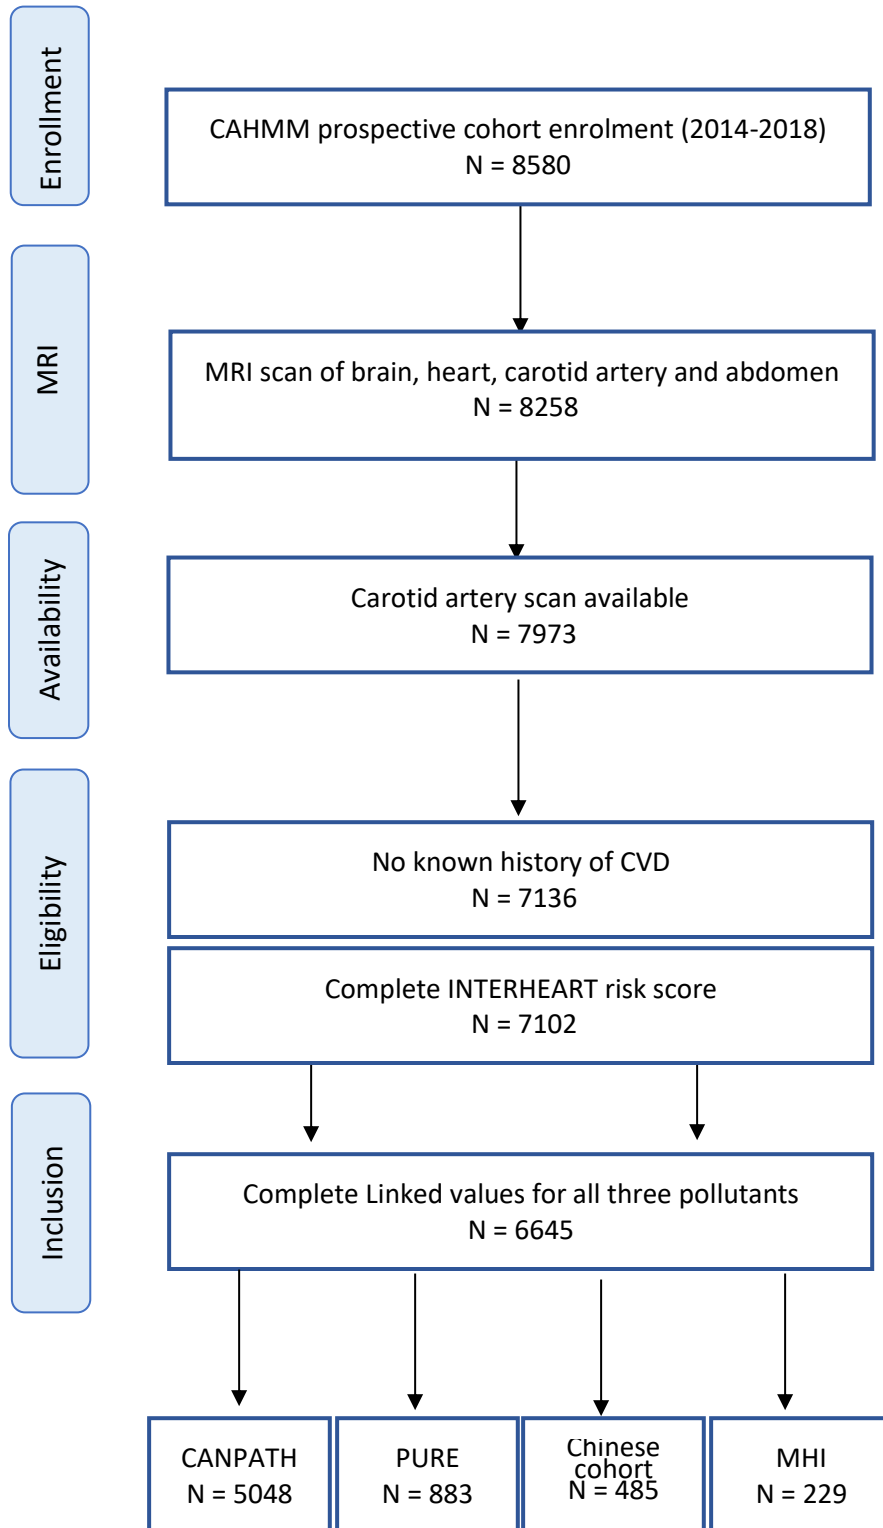

Supplement: pone.0309912.s001.pdf [file pone.0309912.s001.pdf]
