# Supplementary material for: Exposure to air pollutants and subclinical carotid atherosclerosis measured by magnetic resonance imaging: A cross-sectional analysis
Source: PubMed Central journal article supplement (PMC11527219; doi:10.1371/journal.pone.0309912), 2024-10-31
Supplement: pone.0309912.s002.pdf [file pone.0309912.s002.pdf]

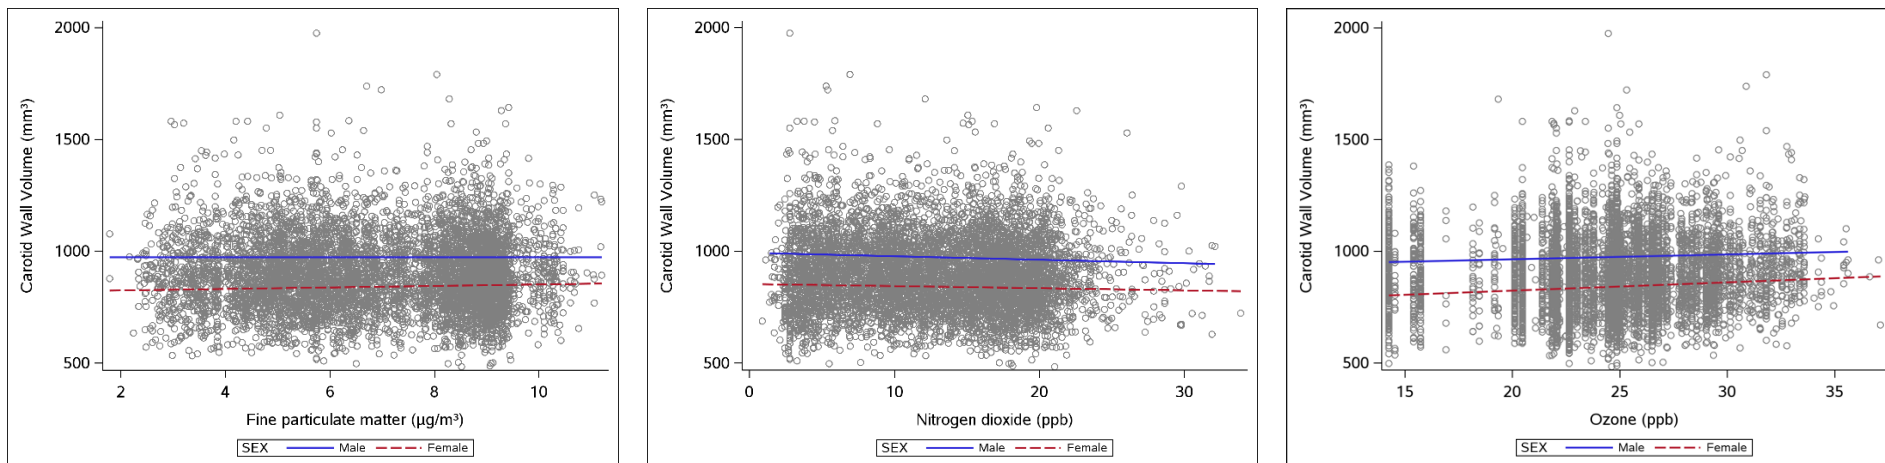

**Figure S2.** Scatterplot of air pollutants by carotid wall volume measurements with regression lines stratified by sex
