# Supplementary material for: Exposure to air pollutants and subclinical carotid atherosclerosis measured by magnetic resonance imaging: A cross-sectional analysis
Source: PubMed Central journal article supplement (PMC11527219; doi:10.1371/journal.pone.0309912), 2024-10-31
Supplement: pone.0309912.s003.pdf [file pone.0309912.s003.pdf]

**Table S1. Anthropometric characteristics of the study population by sex**

|                                                     | <b>N</b> | <b>Overall</b> | <b>Women</b> | <b>Men</b>  |
|-----------------------------------------------------|----------|----------------|--------------|-------------|
| Number of participants                              | 6645     | 6645           | 3718         | 2927        |
| Age, y                                              | 6645     | 57.6 (8.8)     | 57.1 (8.6)   | 58.1 (9.0)  |
| Weight, kg                                          | 6645     | 76.3 (16.5)    | 70.0 (15.2)  | 84.3 (14.5) |
| Height, cm                                          | 6645     | 168.5 (9.4)    | 162.7 (6.6)  | 175.7 (7.1) |
| <b>Body Mass Index, mean (SD), kg/m<sup>2</sup></b> | 6645     | 26.8 (4.9)     | 26.4 (5.4)   | 27.2 (4.2)  |
| <25 (Normal), n (%)                                 | 6645     | 2657 (40.0)    | 1725 (46.4)  | 932 (31.8)  |
| 25-29 (Overweight), n (%)                           | 6645     | 2536 (38.2)    | 1173 (31.5)  | 1363 (46.6) |
| 30+ (Obese), n (%)                                  | 6645     | 1452 (21.9)    | 820 (22.1)   | 632 (21.6)  |
| Percent Body Fat, %                                 | 6624     | 30.6 (9.2)     | 35.2 (8.1)   | 24.7 (6.9)  |
| Waist, cm                                           | 6645     | 88.6 (13.7)    | 84.1 (13.5)  | 94.2 (11.9) |
| Hip, cm                                             | 6645     | 101.3 (10.7)   | 101.3 (12.2) | 101.4 (8.4) |
| Waist to hip ratio                                  | 6645     | 0.87 (0.08)    | 0.83 (0.07)  | 0.93 (0.07) |
| Waist to hip ratio obese, n (%)                     | 6645     | 3302 (49.7)    | 1388 (37.3)  | 1914 (65.4) |
| <b>Blood Pressure</b>                               |          |                |              |             |
| Systolic, mmHg                                      | 6645     | 129 (17)       | 125 (17)     | 134 (15)    |
| Diastolic, mmHg                                     | 6645     | 80 (10)        | 78 (10)      | 82 (10)     |
| Heart rate, beats/minute                            | 6644     | 70.4 (11.0)    | 71.3 (10.5)  | 69.3 (11.5) |

Presented data are means (SD) unless otherwise indicated.
