# Supplementary material for: Exposure to air pollutants and subclinical carotid atherosclerosis measured by magnetic resonance imaging: A cross-sectional analysis
Source: PubMed Central journal article supplement (PMC11527219; doi:10.1371/journal.pone.0309912), 2024-10-31
Supplement: pone.0309912.s004.pdf [file pone.0309912.s004.pdf]

**Table S2. Demographics & Lifestyle characteristics of the study population by sex**

|                                             | <b>N</b> | <b>Overall</b> | <b>Women</b> | <b>Men</b>  |
|---------------------------------------------|----------|----------------|--------------|-------------|
| Number of participants                      | 6645     | 6645           | 3718         | 2927        |
| Age, mean (SD), y                           | 6645     | 57.6 (8.8)     | 57.1 (8.6)   | 58.1 (9.0)  |
| <b>Self-reported ethnicity</b>              |          |                |              |             |
| East & South East Asian                     | 6645     | 894 (13.5)     | 517 (13.9)   | 377 (12.9)  |
| South Asian                                 | 6645     | 223 (3.4)      | 95 (2.6)     | 128 (4.4)   |
| White                                       | 6645     | 5387 (81.1)    | 3017 (81.1)  | 2370 (81.0) |
| Other <sup>a</sup>                          | 6645     | 141 (2.1)      | 89 (2.4)     | 52 (1.8)    |
| <b>Highest Education Attained</b>           |          |                |              |             |
| High school or less                         | 6541     | 842 (12.9)     | 513 (14.0)   | 329 (11.4)  |
| College or Trade                            | 6541     | 2107 (32.2)    | 1225 (33.5)  | 882 (30.5)  |
| University Degree                           | 6541     | 3592 (54.9)    | 1915 (52.4)  | 1677 (58.1) |
| <b>Smoke status</b>                         |          |                |              |             |
| Current                                     | 6645     | 352 (5.3)      | 189 (5.1)    | 163 (5.6)   |
| Former                                      | 6645     | 2241 (33.7)    | 1225 (32.9)  | 1016 (34.7) |
| Never                                       | 6645     | 4052 (61.0)    | 2304 (62.0)  | 1748 (59.7) |
| Living with partner/married                 | 6537     | 4938 (75.5)    | 2554 (69.9)  | 2384 (82.7) |
| <b>Employment</b>                           |          |                |              |             |
| Full or part time                           | 6534     | 4624 (70.8)    | 2540 (69.6)  | 2084 (72.3) |
| Retired                                     | 6534     | 1436 (22.0)    | 744 (20.4)   | 692 (24.0)  |
| No paid work                                | 6534     | 474 (7.3)      | 366 (10.0)   | 108 (3.7)   |
| <b>Individual Social disadvantage score</b> |          |                |              |             |
| Low disadvantage                            | 6121     | 3677 (60.1)    | 1897 (56.1)  | 1780 (65.0) |
| Moderate disadvantage                       | 6121     | 2072 (33.9)    | 1214 (35.9)  | 858 (31.3)  |
| High disadvantage                           | 6121     | 372 (6.1)      | 273 (8.1)    | 99 (3.6)    |
| <b>INTERHEART risk score, mean (SD)</b>     |          |                |              |             |
| Low                                         | 6645     | 3392 (51.0)    | 2221 (59.7)  | 1171 (40.0) |
| Moderate                                    | 6645     | 2123 (31.9)    | 1063 (28.6)  | 1060 (36.2) |
| High                                        | 6645     | 1130 (17.0)    | 434 (11.7)   | 696 (23.8)  |
| <b>Usual workplace location</b>             |          |                |              |             |
| Outside home community                      | 6605     | 2301 (34.8)    | 1196 (32.3)  | 1105 (38.0) |

Presented data are n (%) unless otherwise specified. <sup>a</sup> Includes Blacks, Indigenous, Mixed and unknown ethnicity.
