# Supplementary material for: Exposure to air pollutants and subclinical carotid atherosclerosis measured by magnetic resonance imaging: A cross-sectional analysis
Source: PubMed Central journal article supplement (PMC11527219; doi:10.1371/journal.pone.0309912), 2024-10-31
Supplement: pone.0309912.s005.pdf [file pone.0309912.s005.pdf]

**Table S3. Environmental characteristics of the study population by sex**

|                                                            | <b>N</b> | <b>Overall</b> | <b>Women</b>   | <b>Men</b>     |
|------------------------------------------------------------|----------|----------------|----------------|----------------|
| Number of participants                                     | 6645     | 6645           | 3718           | 2927           |
| <b>Neighbourhood Deprivation</b>                           |          |                |                |                |
| Material factor score                                      | 6447     | -0.017 (0.041) | -0.017 (0.041) | -0.017 (0.040) |
| Social factor score                                        | 6447     | 0.001 (0.041)  | 0.002 (0.041)  | -0.000 (0.041) |
| <b>Walkability Measures</b>                                |          |                |                |                |
| ALE Index                                                  | 6640     | 1.806 (4.501)  | 1.769 (4.320)  | 1.853 (4.721)  |
| ALE Index Class, n (%)                                     |          |                |                |                |
| Class 1: very low                                          | 6640     | 772 (11.6)     | 436 (11.7)     | 336 (11.5)     |
| Class 2                                                    | 6640     | 1917 (28.9)    | 1037 (27.9)    | 880 (30.1)     |
| Class 3                                                    | 6640     | 2014 (30.3)    | 1156 (31.1)    | 858 (29.3)     |
| Class 4                                                    | 6640     | 1182 (17.8)    | 671 (18.1)     | 511 (17.5)     |
| Class 5: very high                                         | 6640     | 755 (11.4)     | 414 (11.1)     | 341 (11.7)     |
| <b>Number of participants in CMAs, n(%)</b>                | 6645     | 6134 (92.3)    | 3406 (91.6)    | 2728 (93.2)    |
| <b>Linked Air Quality Measures</b>                         |          |                |                |                |
| PM <sub>2.5</sub> , ug/m <sup>3</sup> , over 2008-2012     | 6645     | 6.9 (2.0)      | 7.0 (2.0)      | 6.7 (2.0)      |
| NO <sub>2</sub> , ppb, over 2008-2012                      | 6645     | 12.9 (5.9)     | 12.9 (5.9)     | 12.9 (5.8)     |
| Ozone, ppb, over 2008-2012                                 | 6645     | 24.6 (4.0)     | 24.8 (4.1)     | 24.3 (3.9)     |
| Ozone warm season rolling 8hr average, ppb, over 2008-2012 | 1597     | 37.5 (7.7)     | 37.8 (7.7)     | 37.0 (7.6)     |

Presented data are means (SD) unless otherwise indicated.
